# Supplementary material for: Ecotoxicological Estimation of 4-Cumylphenol, 4-t-Octylphenol, Nonylphenol, and Volatile Leachate Phenol Degradation by the Microscopic Fungus Umbelopsis isabellina Using a Battery of Biotests
Source: MDPI journal article supplement (doi:10.3390/ijerph19074093), 2022-03-30
Supplement: s1 [file s1]

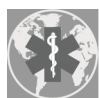

Supplementary Materials

## Ecotoxicological estimation of 4-cumylphenol, 4-*t*-octylphenol, nonylphenol and volatile leachate phenol degradation by the microscopic fungus *Umbelopsis isabellina* using a battery of biotests

Tomasz Janicki <sup>1</sup>, Andrzej Długoński <sup>2,3</sup>, Aleksandra Felczak <sup>1</sup>, Jerzy Długoński <sup>1</sup> and Mariusz Krupiński <sup>1,\*</sup>

<sup>1</sup> Department of Industrial Microbiology and Biotechnology, Faculty of Biology and Environmental Protection, University of Lodz, Banacha 12/16 Street, 90-237 Lodz, Poland; janickithomas@gmail.com (T.J.); aleksandra.felczak@biol.uni.lodz.pl (A.F.); jerzy.dlugonski@biol.uni.lodz.pl (J.D.); mariusz.krupinski@biol.uni.lodz.pl (M.K.)

<sup>2</sup> Institute of Biological Sciences, Faculty of Biology and Environmental Sciences, Cardinal Stefan Wyszyński University in Warsaw, 1/3 Wóycickiego Street, 01-038 Warsaw, Poland; andrzej.dlugonski@biol.uni.lodz.pl (A.D.)

<sup>3</sup> Institute of Ecology and Environmental Protection, Faculty of Biology and Environmental Protection, University of Lodz, Banacha 12/16 Street, 90-237 Lodz, Poland; andrzej.dlugonski@biol.uni.lodz.pl (A.D.)

\* Correspondence: mariusz.krupinski@biol.uni.lodz.pl

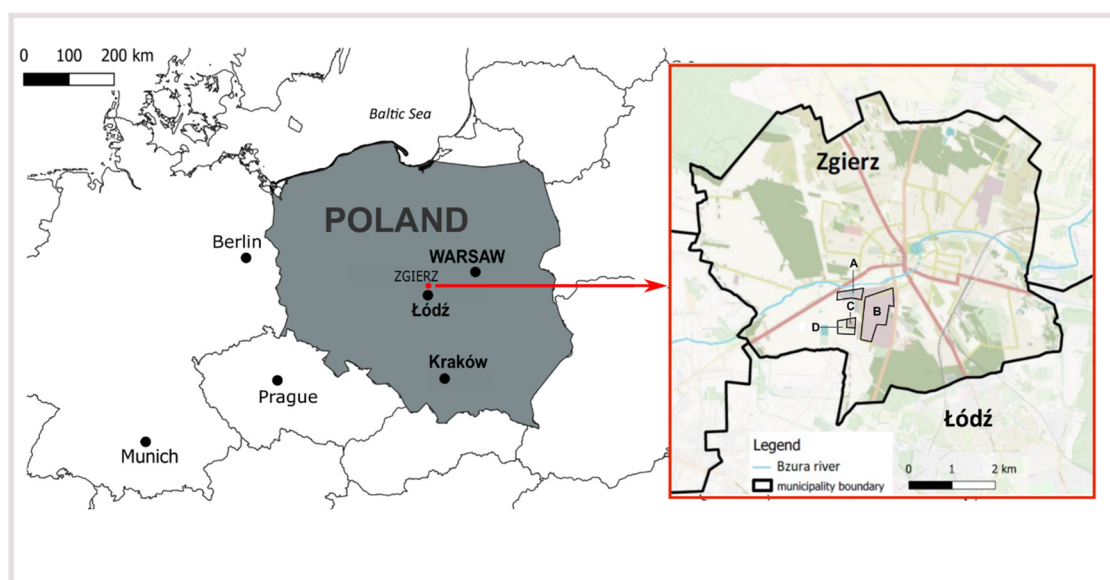

**Figure S1.** Location of leachate collection from post-industrial landfills. Study area location in Zgierz city (Poland, Central Europe). A. The municipal and industrial wastewater treatment plant, B. The former "Boruta" Dye Industry Plant area, C. The closed landfill for hazardous waste of the former "Boruta" Dye Industry Plant, D. The closed energy ash and gypsum landfill.

**Table S1.** Basic analysis of the landfill leachate collected from the hazardous waste landfill of the former “Boruta” dye production plants in Zgierz.

| Parameter         | Method              | Unit                              | Value          | Standard  |
|-------------------|---------------------|-----------------------------------|----------------|-----------|
| pH                | PN-EN ISO 10523:12  | pH                                | 7.2 ± 0.4      | 6.5 – 9.0 |
| Colour            | PN-EN ISO 7887:2012 | Pt-Co                             | 2920 ± 230     | -         |
| Unit weight       | ASTM D854           | g cm <sup>-3</sup>                | 1.018 ± 0.003  | -         |
| Conductivity      | PN-EN 27888:1999    | µS                                | 11805 ± 673    | -         |
| COD <sub>Mn</sub> | PN-ISO 15705:2005   | mg L <sup>-1</sup> O <sub>2</sub> | 348.8 ± 92.4   | 125       |
| TOC               | PN-EN 1484:1999     | mg L <sup>-1</sup> C              | 1040.5 ± 190.4 | 30        |
| BOD <sub>5</sub>  | PN-EN 1899-2:2002   | mg L <sup>-1</sup> O <sub>2</sub> | 300 ± 15.2     | -         |

**Table S2.** Chemical contaminants of the landfill leachate.

| Parameter        | Method                 | Unit                                   | Value           | Standard |
|------------------|------------------------|----------------------------------------|-----------------|----------|
| Nitrites         | PN-EN ISO 13395:2001   | mg L <sup>-1</sup> NO <sub>2</sub>     | 0.026 ± 006     | 1        |
| Nitrates         | PN-EN ISO 10304-1:2009 | mg L <sup>-1</sup> NO <sub>3</sub>     | < 1.7           | 30       |
| Sulphates        | PN-EN ISO 10304-1:2009 | mg L <sup>-1</sup> SO <sub>4</sub>     | 15 ± 3          | 500      |
| Chlorides        | PN-EN ISO 10304-1:2009 | mg L <sup>-1</sup> Cl                  | 2.1 ± 0.4       | 1000     |
| Cyanides (free)  | PN-EN ISO 14403-2:2012 | mg L <sup>-1</sup>                     | < 0.008         | -        |
| Cyanides (bound) | PN-EN ISO 14403-2:2012 | mg L <sup>-1</sup>                     | 0.045 ± 0.008   | -        |
| Antimony         | PN-EN ISO 11885:2009   | mg L <sup>-1</sup> Sb                  | <0.020          | 0.3      |
| Arsenic          | PN-EN ISO 11885:2009   | mg L <sup>-1</sup> As                  | <0.020          | 0.1      |
| Barium           | PN-EN ISO 11885:2009   | mg L <sup>-1</sup> Ba                  | 0.37 ± 0.08     | 2        |
| Beryllium        | PN-EN ISO 11885:2009   | mg L <sup>-1</sup> Be                  | <0.004          | 1        |
| Boron            | PN-EN ISO 11885:2009   | mg L <sup>-1</sup> B                   | 20.35 ± 4.68    | 1        |
| Chromium (total) | PN-EN ISO 11885:2009   | mg L <sup>-1</sup> Cr <sub>total</sub> | 0.055 ± 0.011   | 0.1      |
| Zinc             | PN-EN ISO 11885:2009   | mg L <sup>-1</sup> Zn                  | 0.067 ± 0.015   | 2        |
| Aluminum         | PN-EN ISO 11885:2009   | mg L <sup>-1</sup> Al                  | 0.071 ± 0.016   | 3        |
| Cadmium          | PN-EN ISO 11885:2009   | mg L <sup>-1</sup> Cd                  | 0.0015 ± 0.0003 | 0.4      |

|                        |                        |                       |                 |      |
|------------------------|------------------------|-----------------------|-----------------|------|
| Cobalt                 | PN-EN ISO 11885:2009   | mg L <sup>-1</sup> Co | <0.002          | 1    |
| Manganese              | PN-EN ISO 11885:2009   | mg L <sup>-1</sup> Mn | 0.17 ± 0.04     | -    |
| Copper                 | PN-EN ISO 11885:2009   | mg L <sup>-1</sup> Cu | 0.014 ± 0.003   | 0.5  |
| Molybdenum             | PN-EN ISO 11885:2009   | mg L <sup>-1</sup> Mo | 0.057 ± 0.009   | 1    |
| Nickel                 | PN-EN ISO 11885:2009   | mg L <sup>-1</sup> Ni | 0.23 ± 0.04     | 0.5  |
| Lead                   | PN-EN ISO 11885:2009   | mg L <sup>-1</sup> Pb | 0.023 ± 0.004   | 0.5  |
| Selenium               | PN-EN ISO 11885:2009   | mg L <sup>-1</sup> Se | <0.050          | -    |
| Silver                 | PN-EN ISO 11885:2009   | mg/L Ag               | <0.010          | 0.1  |
| Thallium               | PN-EN ISO 11885:2009   | mg L <sup>-1</sup> Tl | <0.020          | 1    |
| Titanium               | PN-EN ISO 11885:2009   | mg L <sup>-1</sup> Ti | 0.024 ± 0.005   | 1    |
| Vanadium               | PN-EN ISO 11885:2009   | mg L <sup>-1</sup> V  | <0.006          | 2    |
| Iron                   | PN-EN ISO 11885:2009   | mg L <sup>-1</sup> Fe | 30.88 ± 5.87    | 10   |
| Mercury                | EPA 7473 02.2007       | mg L <sup>-1</sup> Hg | 0.0014 ± 0.0002 | 0.06 |
| Volatile phenols       | PN-EN ISO 14402 : 2004 | mg L <sup>-1</sup>    | 1.68 ± 0.48     | 0.1  |
| Petroleum hydrocarbons | PN-EN ISO 9377-2:2003  | mg L <sup>-1</sup>    | 7.2 ± 2.3       | 15   |

**Table S3.** Toxicity bioassays selected for the ecotoxicological analysis of filtrates from *U. isabellina* cultures supplemented with xenobiotics and landfill leachate.

| Trophic level | Species                           | Measure of toxic effect<br>(toxicological endpoints) | 4NP, 4-CP,<br>4- <i>t</i> -OP<br>samples<br>analyzed | VPs samples<br>analyzed |
|---------------|-----------------------------------|------------------------------------------------------|------------------------------------------------------|-------------------------|
| Decomposer    | <i>Aliivibrio fischeri</i>        | Bioluminescence activity                             | X                                                    | X                       |
|               | <i>Microbacterium</i> sp.         | Growth rate inhibition                               | X                                                    |                         |
|               | <i>Brevundimonas diminuta</i>     | Growth rate inhibition                               | X                                                    |                         |
|               | <i>Citrobacter freundii</i>       | Growth rate inhibition                               | X                                                    |                         |
|               | <i>Comamonas testosteroni</i>     | Growth rate inhibition                               | X                                                    |                         |
|               | <i>Enterococcus casseliflavus</i> | Growth rate inhibition                               | X                                                    |                         |

|          |                                  |                                                |                |   |
|----------|----------------------------------|------------------------------------------------|----------------|---|
|          | <i>Delftia acidovorans</i>       | Growth rate inhibition                         | X              |   |
|          | <i>Kurthia gibsonii</i>          | Growth rate inhibition                         | X              |   |
|          | <i>Staphylococcus warneri</i>    | Growth rate inhibition                         | X              |   |
|          | <i>Pseudomonas aurantiaca</i>    | Growth rate inhibition                         | X              |   |
|          | <i>Serratia rubidaea</i>         | Growth rate inhibition                         | X              |   |
|          | <i>Pichia anomala</i>            | Growth rate inhibition                         | X              |   |
|          | <i>Saccharomyces cerevisiae</i>  | Estrogenic/anti-estrogenic activity            | X              |   |
|          |                                  | Androgenic/anti-androgenic activity            |                |   |
| Producer | <i>Sorghum saccharatum</i>       | Seed germination rate, root length reduction   | X              | X |
|          | <i>Lepidium sativum</i>          | Seed germination rate, root length reduction   | X              |   |
|          | <i>Sinapis alba</i>              | Seed germination rate, root length reduction   | X              |   |
|          | <i>Rhapidocelis subcapitata</i>  | Growth rate inhibition                         | X              |   |
|          | <i>Phaeodactylum tricornutum</i> | Growth rate inhibition                         | X              |   |
| Consumer | <i>Thamnocephalus platyurus</i>  | Reduction or complete cessation of food intake | X              |   |
|          | <i>Daphnia magna</i>             | Mortality                                      | X <sup>a</sup> | X |
|          | <i>Artemia franciscana</i>       | Mortality                                      | X <sup>a</sup> | X |

<sup>a</sup> – tests were carried out in previous studies [19]

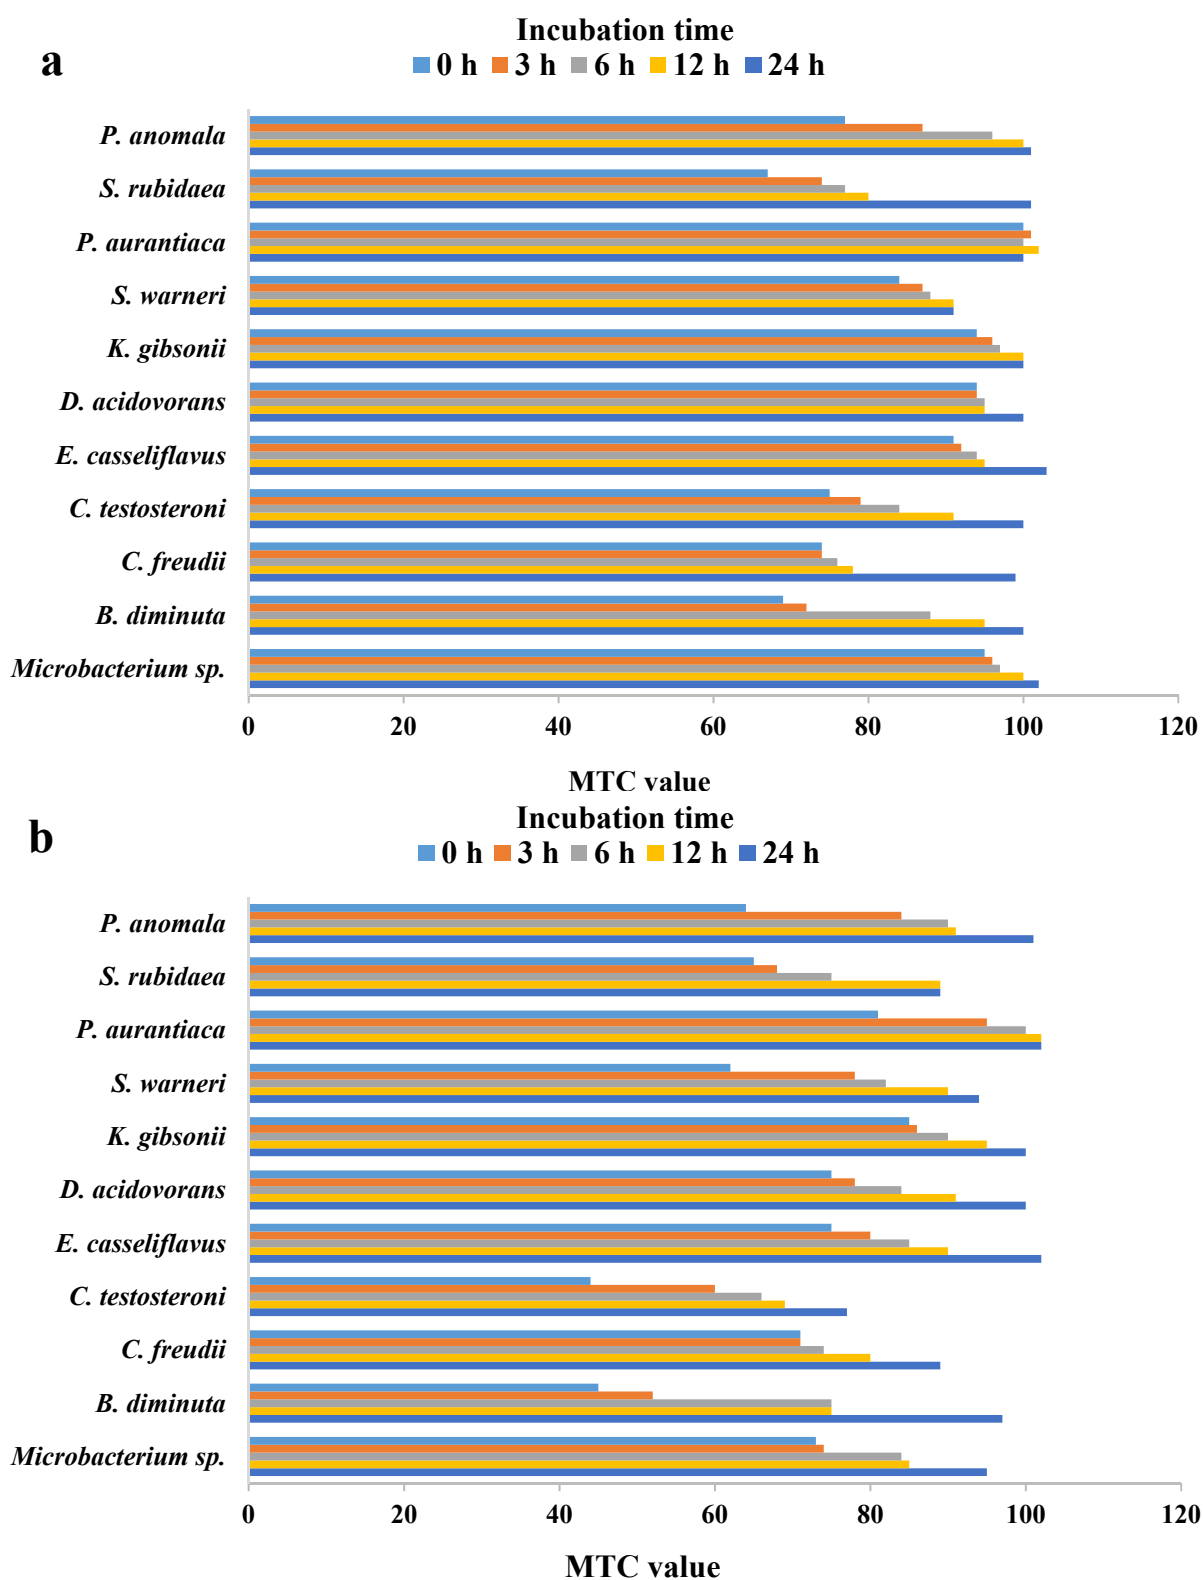

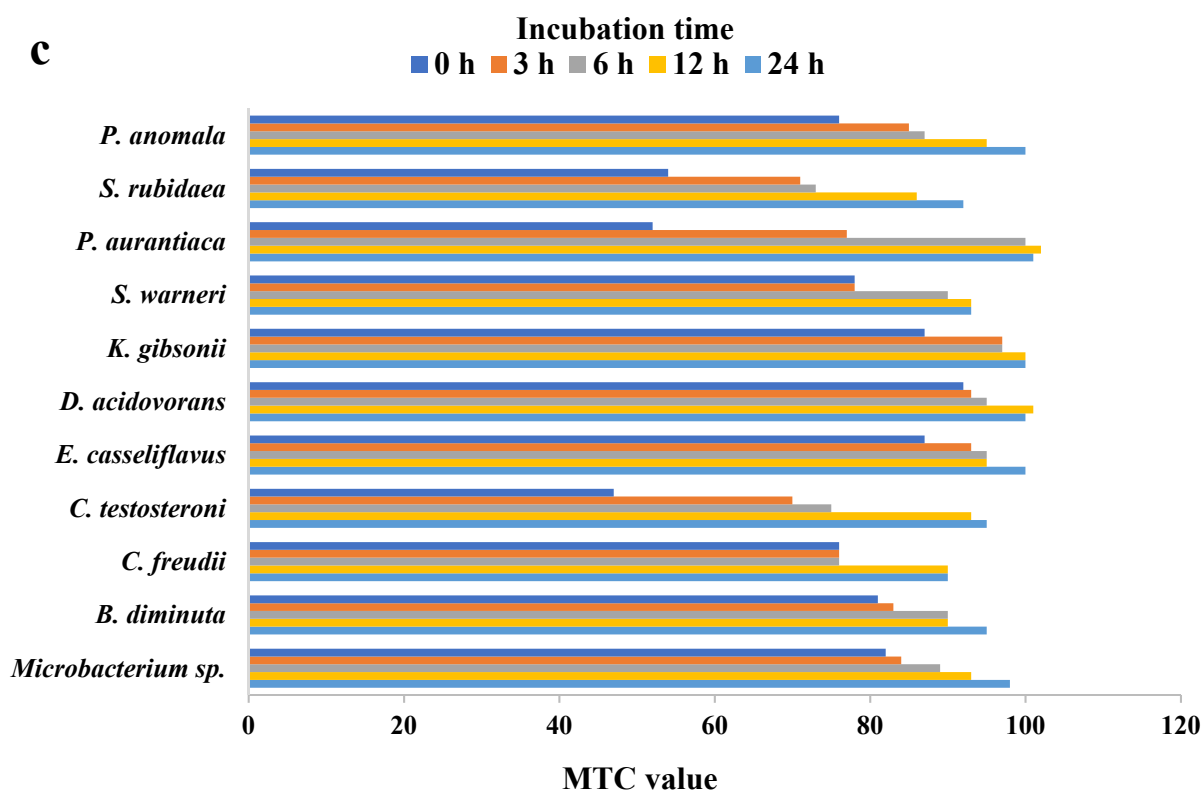

Figure S2. MARA species responses (MTC value) to *U. isabellina* cultures treated with test xenobiotics: a – 4-CP, b – NP, c – 4-*t*-OP.

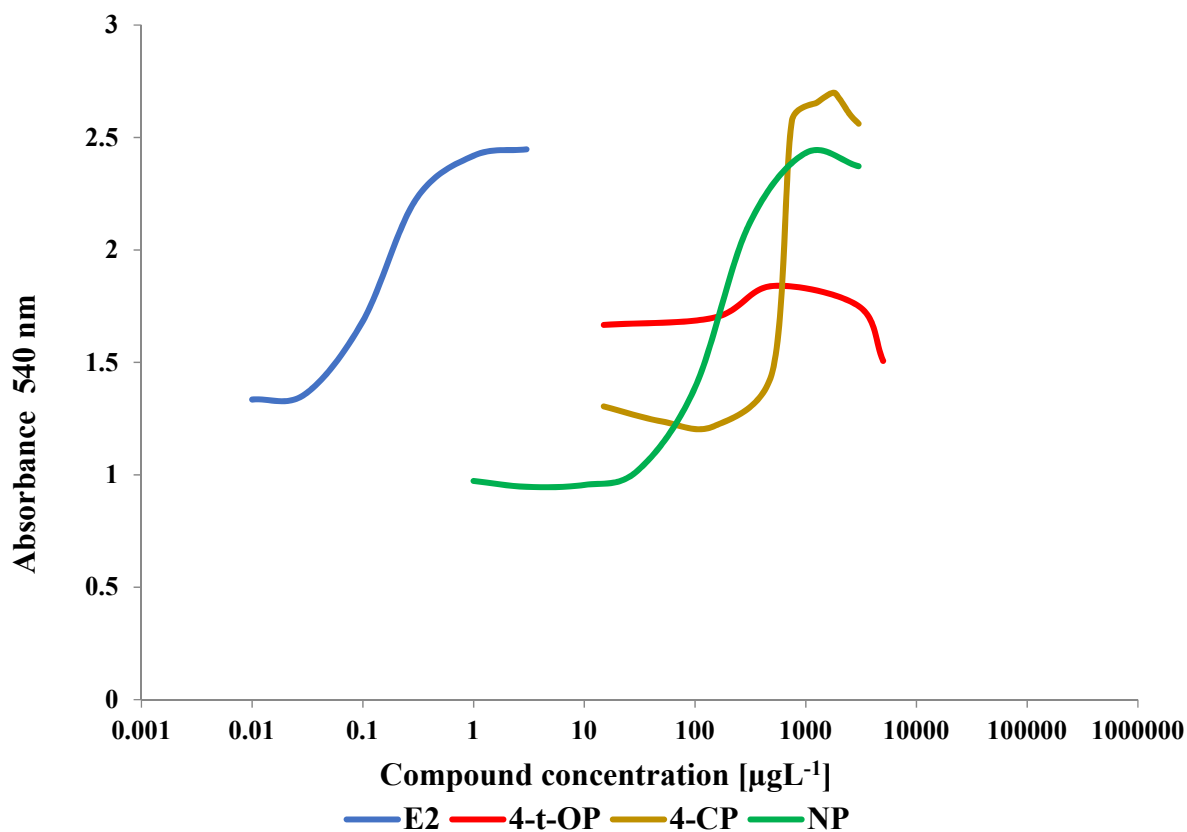

Figure S3. Oestrogenic activity of 4-CP, 4-*t*-OP and NP.

**Table S4.** Anti-androgenic activity of post-culture filtrates obtained after incubation of *U. isabellina* with NP or 4-CP (post-culture liquid concentration – 4%).

| Time (h) | Absorbance of 4-CP (% of control, i.e. DHT) | Absorbance of 4- <i>t</i> -OP (% of control, i.e. DHT) |
|----------|---------------------------------------------|--------------------------------------------------------|
| 0        | 65.50 ± 1.52                                | 75.04 ± 1.12                                           |
| 3        | 75.01 ± 0.90                                | 83.20 ± 1.42                                           |
| 6        | 82.28 ± 1.23                                | 85.18 ± 0.64                                           |
| 12       | 81.98 ± 0.56                                | 87.90 ± 0.49                                           |
| 24       | 86.73 ± 0.70                                | 93.72 ± 0.80                                           |

**Table S5.** Plant biological endpoints for testing the phytotoxicity of fungal post-culture filtrates supplemented with landfill leachate.

| Landfill leachate (%) | Time (h) | Germination inhibition (PE%) | Root growth inhibition (PE%) | Germination index (%) |
|-----------------------|----------|------------------------------|------------------------------|-----------------------|
| 20                    | 0        | 0 ± 0                        | 32.5 ± 2.8                   | 59.5 ± 2.0            |
|                       | 24       | 0 ± 0                        | 39.7 ± 2.2                   | 52.4 ± 3.0            |
|                       | 48       | 0 ± 0                        | 49.6 ± 3.0                   | 43.0 ± 2.9            |
|                       | 72       | 0 ± 0                        | 29.3 ± 2.7                   | 62.9 ± 3.6            |
|                       | 96       | 0 ± 0                        | 20.6 ± 3.1                   | 78.3 ± 2.8            |
| 40                    | 0        | 10 ± 2                       | 59.1 ± 3.3                   | 40.6 ± 1.7            |
|                       | 24       | 0 ± 0                        | 64.7 ± 2.8                   | 35.2 ± 2.6            |
|                       | 48       | 0 ± 0                        | 69.2 ± 3.4                   | 30.8 ± 2.0            |
|                       | 72       | 0 ± 0                        | 53.4 ± 3.8                   | 44.6 ± 2.7            |
|                       | 96       | 0 ± 0                        | 40.1 ± 2.5                   | 59.7 ± 2.1            |
